# Supplementary material
Source: HighWire-hosted journal article supplement (https://thorax.bmj.com/content/75/4/351)

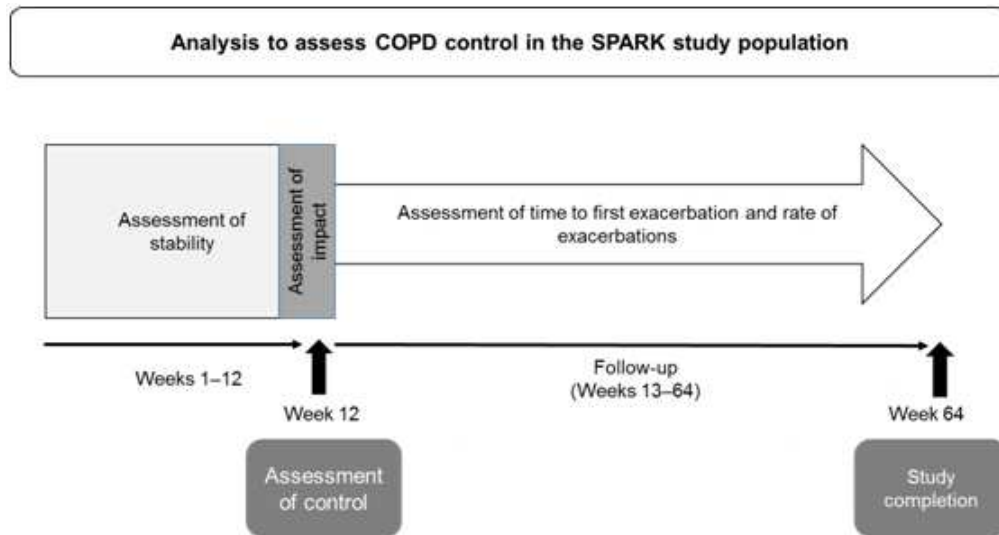

Supplement: inline-supplementary-material-1 [file inline-supplementary-material-1.pdf]

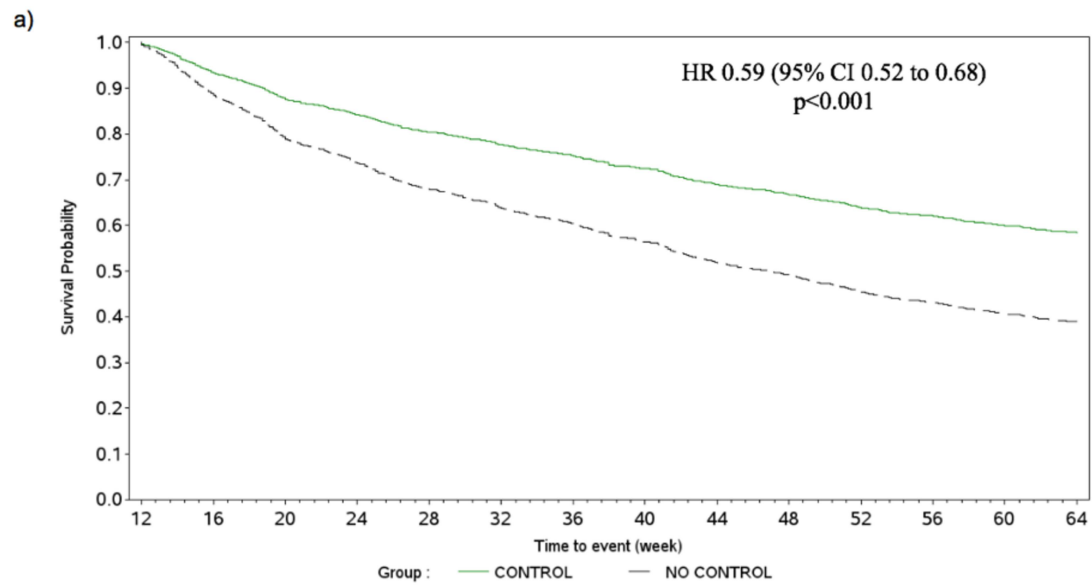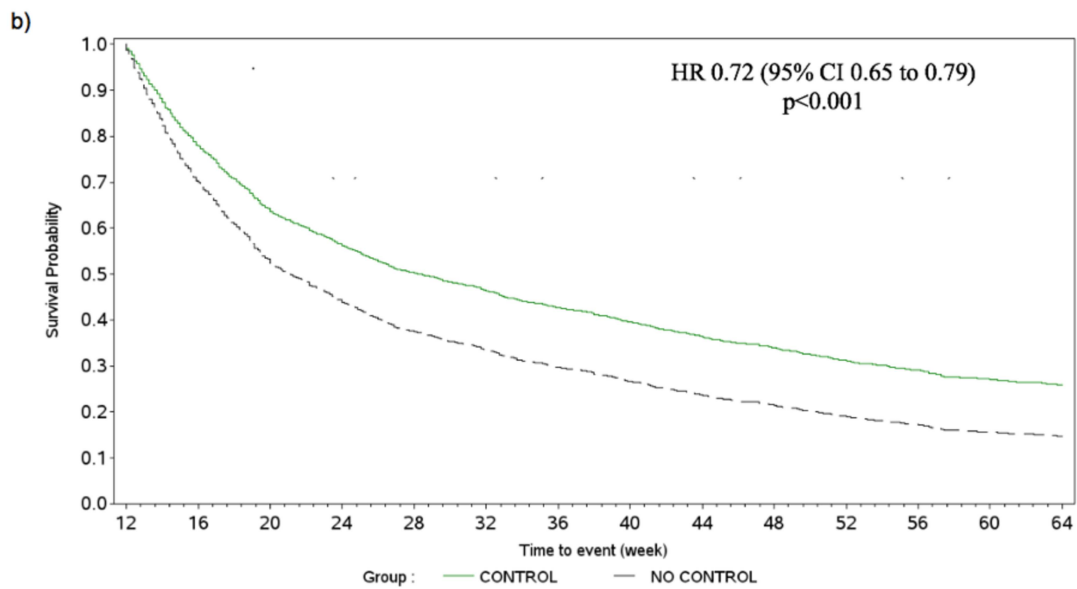

Supplement: inline-supplementary-material-3 [file inline-supplementary-material-3.pdf]

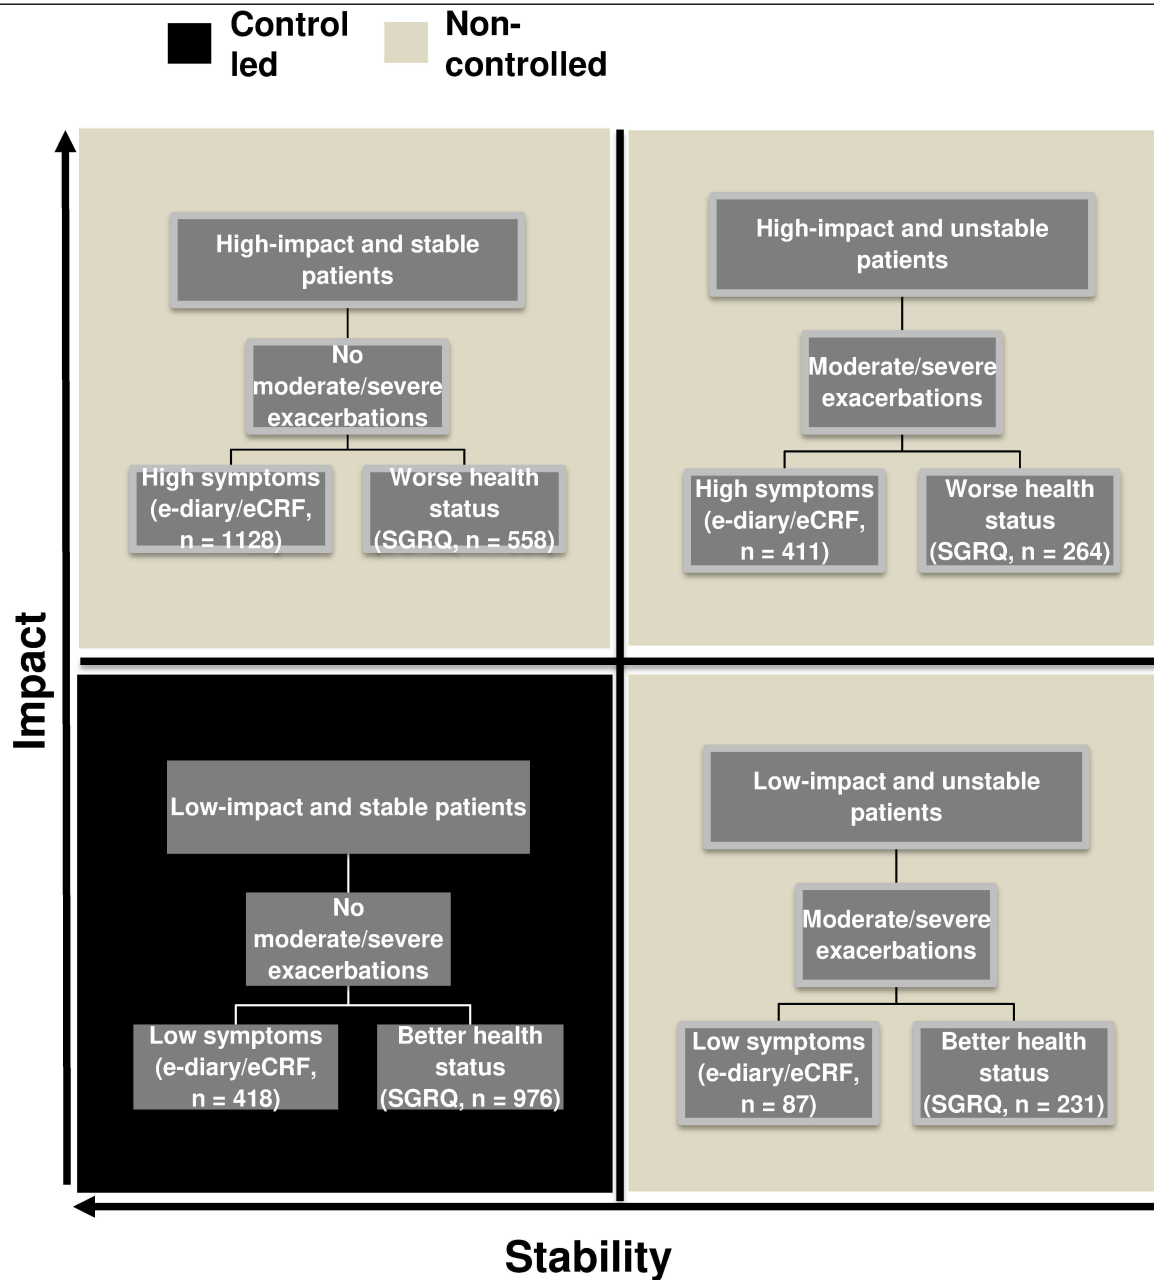

Figure 3

Supplement: inline-supplementary-material-4 [file inline-supplementary-material-4.pdf]
